# Supplementary material for: A Social-Ecological Approach to Studying Variation in Urban Trees and Ecosystem Services in the National Municipal District of Santo Domingo, Dominican Republic
Source: Frontiers journal article supplement (doi:10.3389/frsc.2021.764073), 2022-01-12
Supplement: Table_1.docx [file Table_1.docx]

Supplemental Material. Frequency of plants for species surveyed in i-Tree plots in the the three wards of the National Municipal District of Santo Domingo, Dominican Republic. Species were classified by origin (1 = native, 0 = introduced) and the number of different uses or services (food, medicinal, ornamental, wood, other) for each species is provided.

| **Family** | **Tree species** | **Ward1** | **Ward2** | **Ward3** | **Origin** | **Use*** |
| --- | --- | --- | --- | --- | --- | --- |
| Anacardiaceae | *Mangifera indica L.* | 14 | 8 | 7 | I | 5 |
|  | *Spondias mombin L.* | 2 | 0 | 0 | N | 5 |
| Annonaceae | *Annona muricata L.* | 2 | 6 | 0 | N | 2 |
| Apocynaceae | *Plumeria obtusa L.* | 1 | 0 | 0 | N | 1 |
|  | *Tabernaemontana laeta Mart.* | 1 | 0 | 0 | I | 2 |
| Araliaceae | *Schefflera actinophylla (Endl.) Harms* | 1 | 1 | 0 | I | 1 |
| Araucariaceae | *Araucaria heterophylla (Salisb.) Franco* | 0 | 2 | 1 | I | 3 |
| Arecaceae | *Acrocomia aculeata (Jacq.) Lodd. ex Mart.* | 0 | 3 | 0 | N | 5 |
|  | *Adonidia merrillii (Becc.) Becc.* | 77 | 26 | 8 | I | 1 |
|  | *Archontophoenix alexandrae (F.Muell.) H.Wendl. & Drude* | 1 | 8 | 0 | I | 1 |
|  | *Caryota urens L.* | 1 | 0 | 0 | I | 5 |
|  | *Coccothrinax sp* | 0 | 1 | 0 | N | 1 |
|  | *Cocos nucifera L.* | 6 | 16 | 2 | I | 5 |
|  | *Dypsis lutescens (H.Wendl.) Beentje & J.Dransf.* | 22 | 22 | 0 | I | 1 |
|  | *Livistona sp* | 0 | 1 | 0 | I | 4 |
|  | *Phoenix canariensis Chabaud* | 1 | 4 | 0 | I | 3 |
|  | *Pseudophoenix sp* | 7 | 0 | 0 | N | 1 |
|  | *Ptychosperma elegans (R.Br.) Blume* | 1 | 1 | 0 | I | 1 |
|  | *Roystonea borinquena O.F.Cook* | 2 | 16 | 1 | N | 5 |
|  | *Sabal causiarum (O.F.Cook) Becc.* | 0 | 1 | 0 | N | 3 |
|  | *Sabal sp* | 2 | 0 | 0 | N | 5 |
|  | *Wodyetia bifurcata A.K.Irvine* | 1 | 0 | 0 | I | 2 |
| Asparagaceae | *Dracaena fragrans (L.) Ker Gawl.* | 0 | 3 | 0 | I | 3 |
| Bignoniaceae | *Catalpa longissima (Jacq.) Dum.Cours.* | 1 | 7 | 1 | N | 2 |
|  | *Parmentiera aculeata (Kunth) Seem.* | 1 | 0 | 0 | I | 4 |
|  | *Spathodea campanulata P.Beauv.* | 0 | 4 | 0 | I | 2 |
|  | *Tabebuia aurea (Silva Manso) Benth. & Hook.f. ex S.Moore* | 0 | 3 | 0 | I | 2 |
|  | *Tecoma stans (L.) Juss. ex Kunth* | 1 | 0 | 1 | N | 4 |
| Bixaceae | *Bixa Orellana L.* | 0 | 1 | 0 | I | 2 |
| Cactaceae | *Opuntia ficus-indica (L.) Mill.* | 0 | 0 | 1 | I | 4 |
| Calophyllaceae | *Mammea americana L.* | 0 | 4 | 0 | I | 5 |
| Caricaceae | *Carica papaya L.* | 2 | 0 | 0 | N | 3 |
| Casuarinaceae | *Casuarina equisetifolia L.* | 3 | 0 | 0 | I | 4 |
| Clusiaceae | *Calophyllum brasiliense var. antillanum (Britton) Standl.* | 0 | 2 | 0 | N | 3 |
| Combretaceae | *Bucida buceras L.* | 19 | 6 | 6 | N | 3 |
| **Family** | **Tree species** | **Ward1** | **Ward2** | **Ward3** | **Origin** | **Uses** |
|  | *Terminalia catappa L.* | 0 | 1 | 1 | I | 5 |
| Cupressaceae | *Cupressus sempervirens L* | 0 | 1 | 0 | I | 3 |
| Cycadaceae | *Cycas revoluta Thunb* | 0 | 2 | 0 | I | 2 |
| Euphorbiaceae | *Codiaeum variegatum (L.) Rumph. ex A.Juss.* | 0 | 0 | 3 | I | 2 |
|  | *Hura crepitans L.* | 0 | 1 | 0 | I | 4 |
|  | *Vernicia fordii (Hemsl.) Airy Shaw* | 3 | 1 | 1 | I | 3 |
| Lamiaceae | *Gmelina arborea Roxb.* | 2 | 0 | 2 | I | 4 |
|  | *Tectona grandis L.f.* | 0 | 1 | 0 | I | 3 |
| Lauraceae | *Persea americana Mill.* | 2 | 10 | 5 | I | 4 |
| Leguminosae | *Albizia lebbeck (L.) Benth.* | 3 | 4 | 0 | I | 2 |
|  | *Albizia saman (Jacq.) Merr.* | 1 | 0 | 0 | I | 5 |
|  | *Bauhinia variegata L.* | 1 | 0 | 0 | I | 2 |
|  | *Delonix regia (Hook.) Raf.* | 1 | 3 | 0 | I | 4 |
|  | *Haematoxylum campechianum L.* | 0 | 0 | 1 | I | 4 |
|  | *Leucaena leucocephala (Lam.) de Wit* | 1 | 0 | 0 | I | 5 |
|  | *Pithecellobium dulce (Roxb.) Benth.* | 0 | 2 | 0 | I | 5 |
|  | *Senna siamea (Lam.) H.S.Irwin & Barneby* | 3 | 2 | 0 | I | 5 |
|  | *Tamarindus indica L.* | 0 | 1 | 0 | I | 4 |
| Lythraceae | *Punica granatum L.* | 1 | 0 | 0 | I | 2 |
| Malpighiaceae | *Malpighia emarginata DC* | 0 | 2 | 1 | I | 5 |
| Malvaceae | *Ceiba pentandra (L.) Gaertn.* | 4 | 0 | 0 | N | 4 |
|  | *Guazuma ulmifolia Lam.* | 0 | 2 | 0 | N | 5 |
|  | *Sterculia apetala (Jacq.) H.Karst.* | 1 | 0 | 0 | I | 3 |
|  | *Theobroma cacao L.* | 0 | 2 | 0 | I | 3 |
| Meliaceae | *Azadirachta indica A. Juss.* | 2 | 0 | 5 | I | 4 |
|  | *Swietenia mahogani L.* | 7 | 23 | 0 | N | 1 |
| Moraceae | *Ficus benjamina L.* | 17 | 9 | 2 | I | 2 |
|  | *Ficus carica L.* | 2 | 0 | 0 | I | 1 |
| Myrtaceae | *Eugenia monticola (Sw.) DC.* | 0 | 2 | 0 | I | 4 |
|  | *Pimenta racemosa (Mill.) J.W.Moore* | 1 | 0 | 1 | N | 5 |
|  | *Psidium guajava L.* | 0 | 5 | 2 | N | 2 |
| Nyctaginaceae | *Bougainvillea glabra Choisy* | 0 | 1 | 0 | I | 1 |
| Ochnaceae | *Ouratea striata (Tiegh.) Urb.* | 0 | 0 | 3 | I | 3 |
| Oxalidaceae | *Averrhoa bilimbi L.* | 0 | 0 | 1 | I | 3 |
|  | *Averrhoa carambola L.* | 1 | 0 | 0 | I | 1 |
| Plumbaginaceae | *Limonium arborescens Kuntze* | 0 | 0 | 1 | I | 1 |
| Podocarpaceae | *Podocarpus macrophyllus (Thunb.) Sweet* | 0 | 4 | 0 | I | 5 |
| Polygonaceae | *Coccoloba uvifera (L.) L.* | 4 | 2 | 1 | N | 5 |
| Rosaceae | *Eriobotrya japonica (Thunb.) Lindl.* | 2 | 0 | 0 | I | 4 |
|  | *Prunus cerasus L.* | 1 | 0 | 0 | I | 2 |
| Rubiaceae | *Hamelia patens Jacq.* | 0 | 0 | 1 | N | 3 |
|  | *Morinda citrifolia L.* | 2 | 1 | 2 | I | 4 |
| Rutaceae | *Citrus x aurantium L.* | 2 | 1 | 0 | I | 2 |
| **Family** | **Tree species** | **Ward1** | **Ward2** | **Ward3** | **Origin** | **Uses** |
|  | *Citrus limon (L.) Osbeck* | 2 | 0 | 0 | I | 2 |
|  | *Citrus maxima (Burm.) Merr.* | 1 | 0 | 0 | I | 2 |
|  | *Citrus sinensis (L.) Osbeck* | 2 | 0 | 0 | I | 2 |
|  | *Citrus sp* | 1 | 0 | 3 | I | 2 |
| Sapindaceae | *Melicoccus bijugatus Jacq.* | 1 | 2 | 2 | I | 5 |
| Sapotaceae | *Manilkara zapota (L.) P.Royen* | 0 | 1 | 0 | N | 5 |
| Simaroubaceae | *Simarouba amara Aubl.* | 6 | 8 | 0 | I | 4 |
| Strelitziaceae | *Ravenala madagascariensis Sonn* | 8 | 2 | 0 | I | 1 |
| Urticaceae | *Cecropia palmata Willd.* | 0 | 2 | 0 | I | 2 |
| Verbenaceae | *Citharexylum spinosum L.* | 0 | 3 | 0 | N | 3 |
|  | *Duranta erecta L.* | 0 | 2 | 0 | N | 2 |
| Zygophyllaceae | *Guaiacum officinale L.* | 6 | 0 | 0 | N | 4 |

*Use: Indicated the number of different types of uses that plant species have.
